# Supplementary material for: Ruthenium complex based nanocomposite film with enhanced and selective electrochemical sensing of bifenthrin pesticide
Source: Royal Society of Chemistry journal article supplement (doi:10.1039/d4ra04188g), 2024-01-01
Supplement: d4ra04188g1.pdf [file d4ra04188g1.pdf]

## Supporting Information

to

### **Ruthenium Complex Based Nanocomposite Film with Enhanced and Selective Electrochemical Sensing of Bifenthrin Pesticide**

Sanjeev Bhandari<sup>a</sup>, Bhaskar Sen<sup>b</sup>, Snehadrinarayan Khatua<sup>b</sup>, L. Robindro Singh<sup>c</sup>, Vijay Singh  
Parihar<sup>d\*</sup>, Mrityunjoy Mahato<sup>a\*</sup>

\*To whom correspondence should be addressed:

<sup>a</sup>Physics Division, Department of Basic Sciences and Social Sciences, School of Technology, North-Eastern Hill University, Shillong, Meghalaya, 793022, India, Email: mrityunjoyedu@gmail.com

<sup>b</sup>Centre for Advanced Studies, Department of Chemistry, North-Eastern Hill University, Shillong, Meghalaya 793022, India

<sup>c</sup>Department of Nanotechnology, School of Technology, North-Eastern Hill University, Shillong, Meghalaya, 793022, India.

<sup>d</sup>Biomaterials and Tissue Engineering Group, Faculty of Medicine and Health Technology, Tampere University, 33720 Tampere, Finland, Email: vijay.parihar@tuni.fi

#### **<sup>1</sup>H NMR, <sup>13</sup>C NMR , and ESI-MS spectrum of RuPo complex**

ESI-MS: m/z calculated for [C<sub>36</sub>H<sub>24</sub>F<sub>6</sub>N<sub>6</sub>O<sub>2</sub>PRu]<sup>+</sup> 818.65; found: 818.67; [C<sub>36</sub>H<sub>23</sub>N<sub>6</sub>O<sub>2</sub>Ru]<sup>+</sup> 672.68; found: 672.68. <sup>1</sup>H NMR (400 MHz, CD<sub>3</sub>CN): δ (ppm) = 9.86 (s, 1H), 8.57 (dd, J = 8.2, 1.3 Hz), 8.54 (dd, J = 8.3, 1.3 Hz, 1H), 8.28 (s, 1H), 8.22 (d, J = 1.4 Hz, 2H), 8.15 (dd, J = 5.3, 1.3 Hz, 1H), 8.01 (dd, J = 5.2, 1.2 Hz, 1H), 7.64 (dd, J = 8.2, 5.3, 1H), 7.58 (m, 2H), 6.99 (d, J = 6.1, 1H). <sup>13</sup>C NMR (100 MHz, CD<sub>3</sub>CN): δ (ppm) = 162.8 (1C), 154.0 (1C), 153.8 (1C), 153.8 (1C), 149.7 (1C), 149.3 (1C), 149.1 (1C), 137.2 (2C), 131.9 (1C), 131.8 (1C), 129.0 (1C), 128.9 (1C), 126.7 (1C), 126.6 (1C), 123.9 (1C), 121.6 (1C), 111.1 (1C).

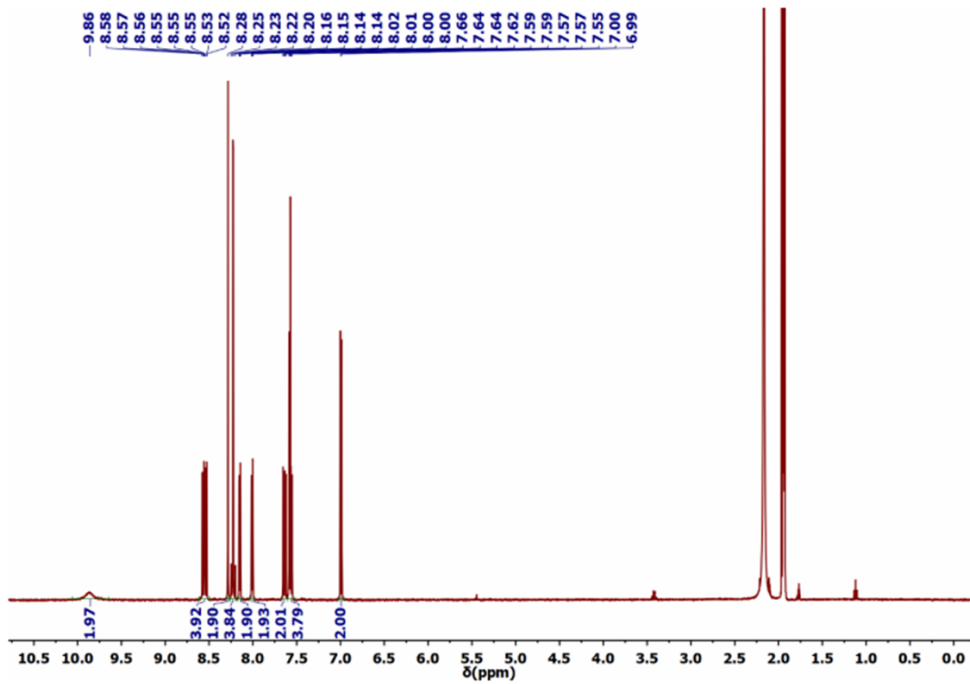

Fig. S1.  $^1\text{H}$  NMR spectrum of RuPo in  $\text{CD}_3\text{CN}$ .

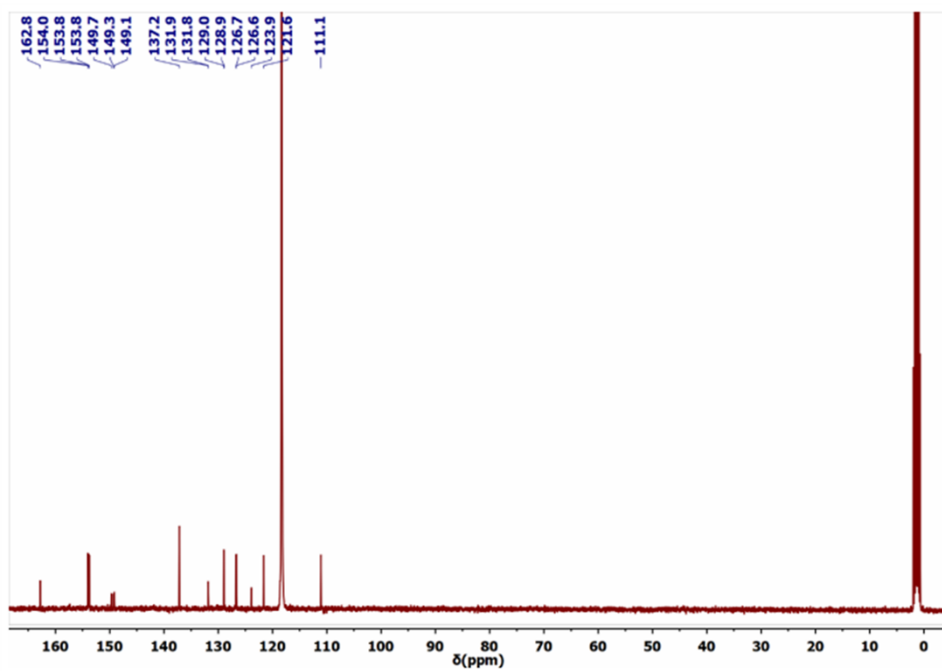

Fig. S2.  $^{13}\text{C}$  NMR spectrum of RuPo in  $\text{CD}_3\text{CN}$ .

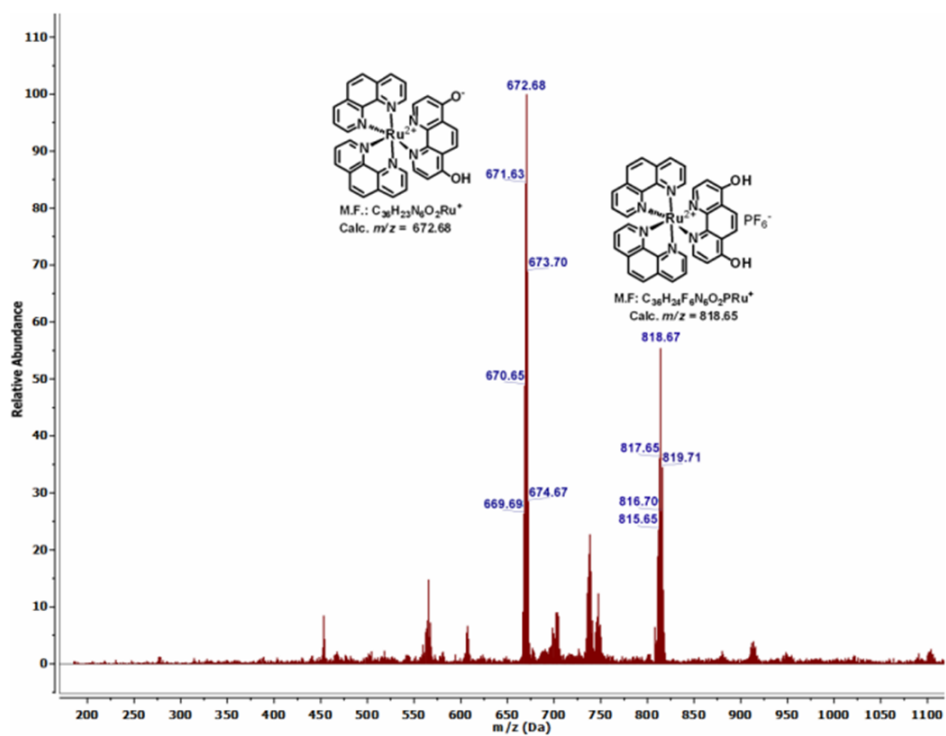

Fig. S3. ESI-MS spectrum of RuPo in CH<sub>3</sub>CN.

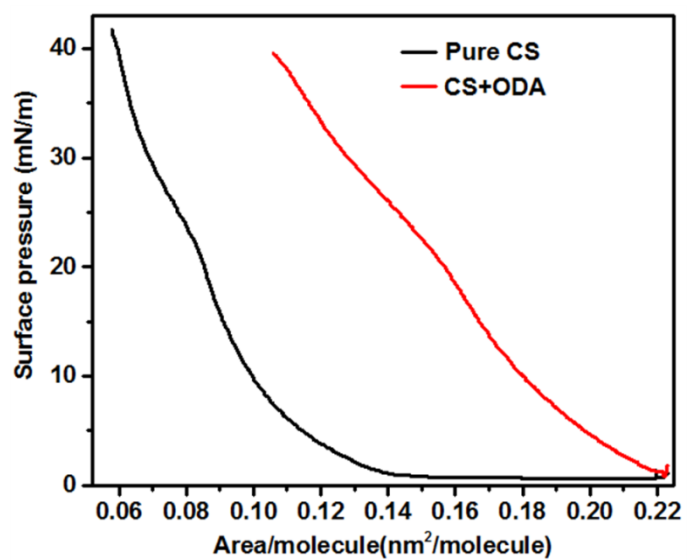

Fig. S4. Isotherm of pure CS and CS+ODA.

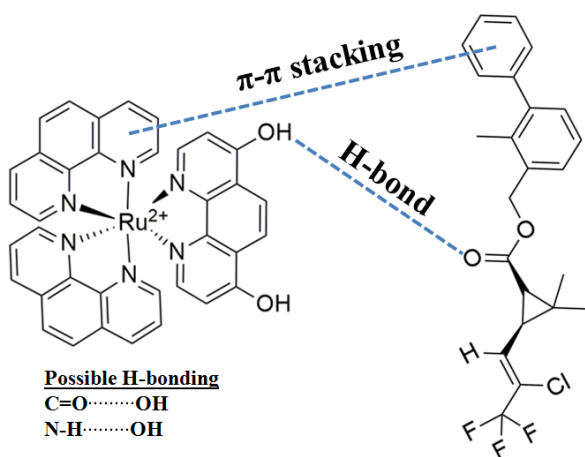

**Fig. S5.** Schematic mechanism for interaction of the RuPo with the BF pesticide.

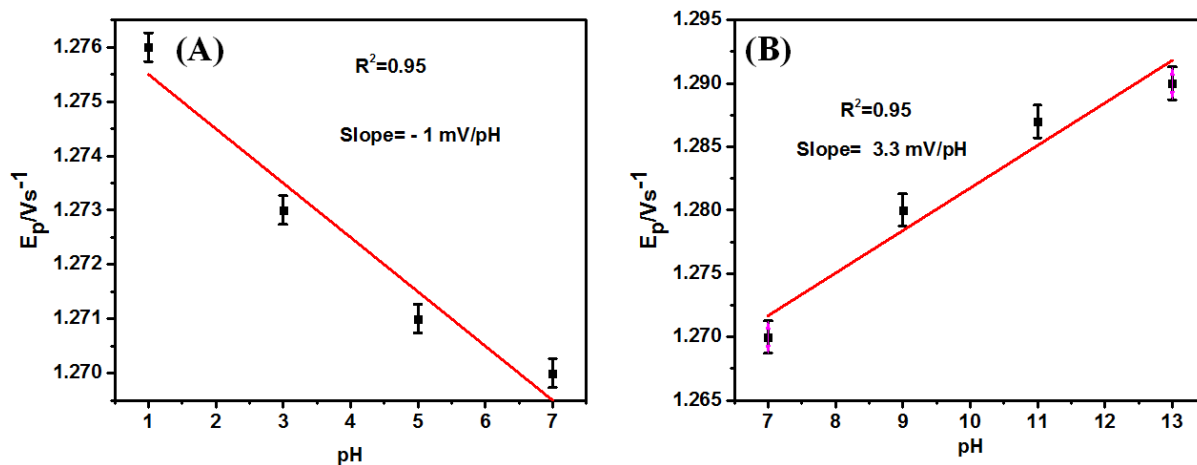

**Fig. S6.** (A) Plot of  $E_p$ (V/s) versus pH (1-7), (B) Plot of  $E_p$ (V/s) versus pH (7-13).

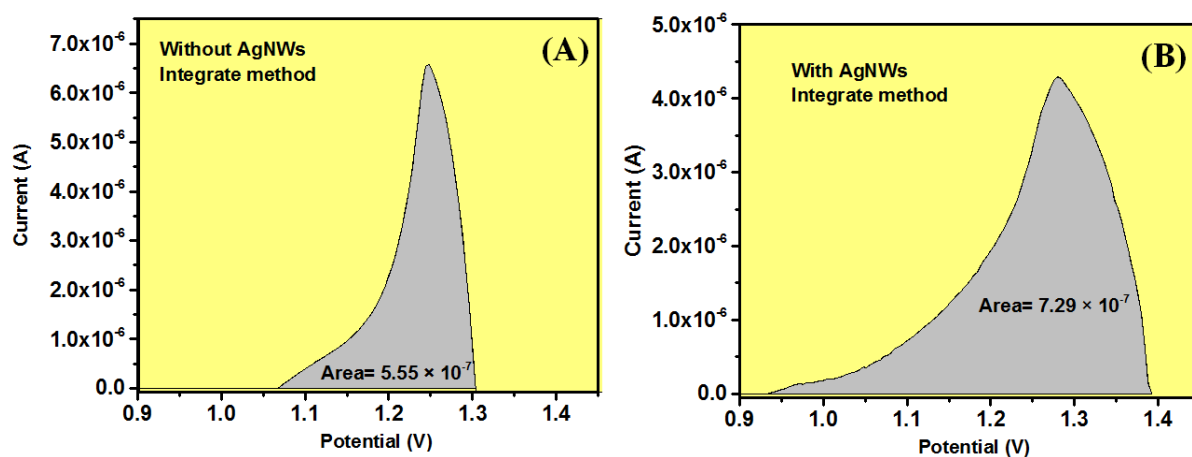

**Fig. S7.** Area of the DPV curve for (A) without AgNWs, (B) with AgNWs.

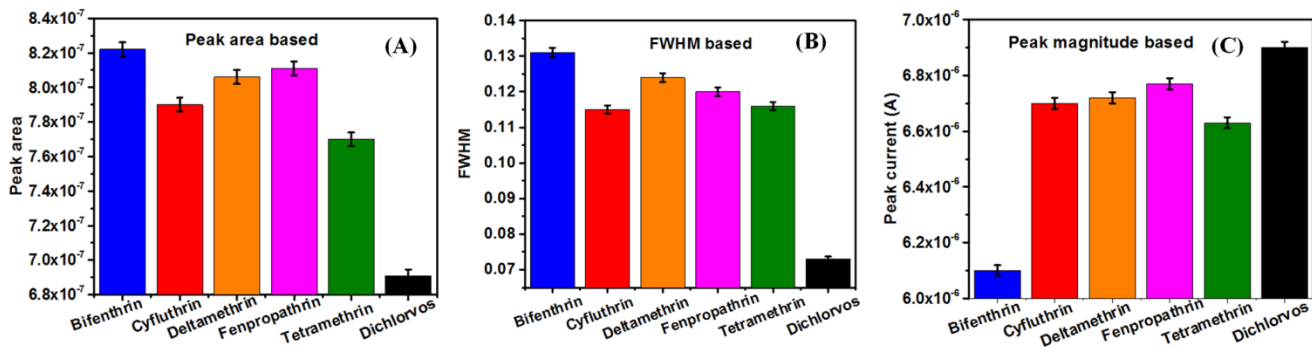

**Fig. S8.** Bar plot of different pesticide versus (A) peak area based, (B) FWHM based, (C) peak magnitude based.

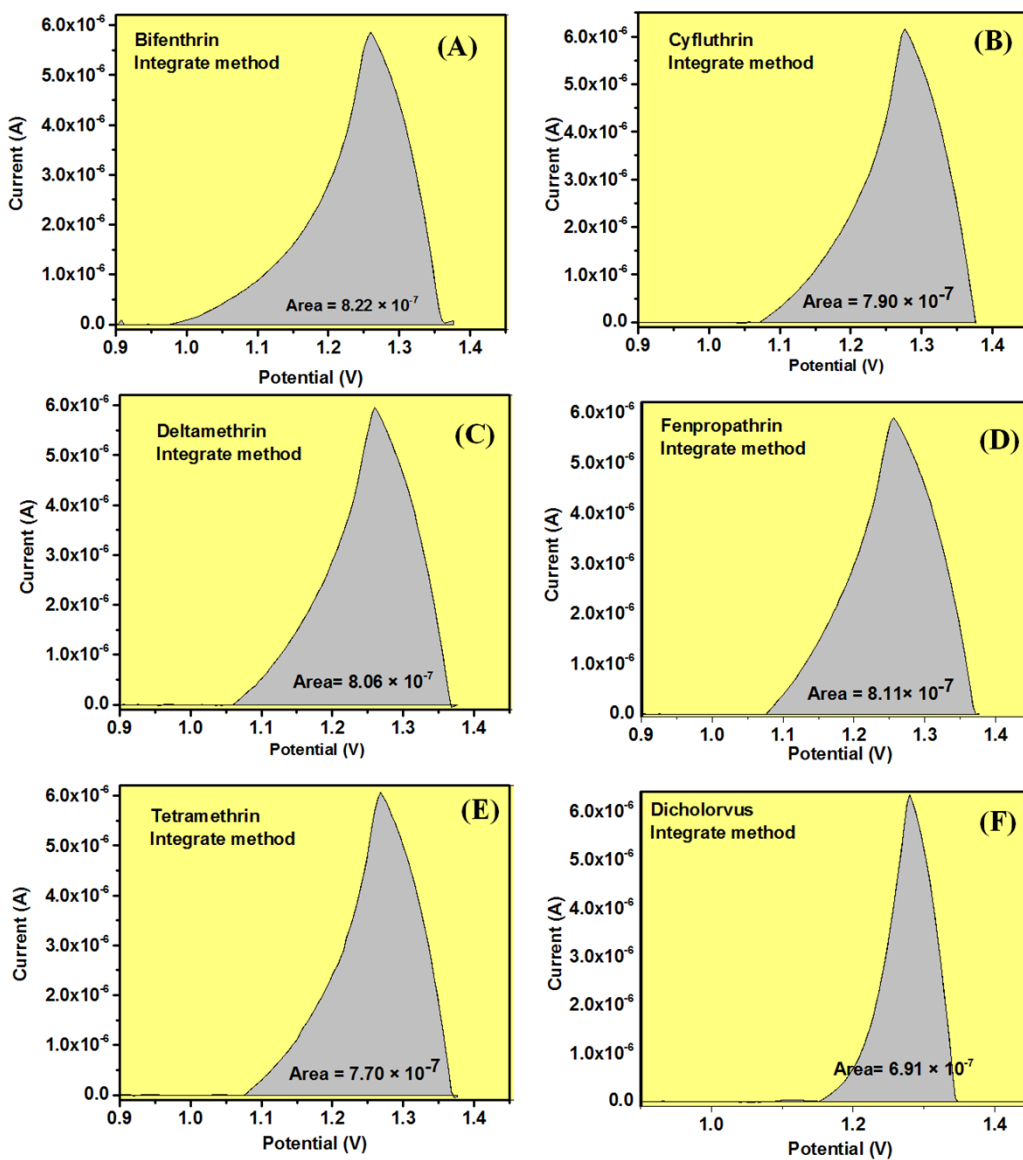

**Fig. S9.** Peak area of the DPV curve for different pesticides (A-F).

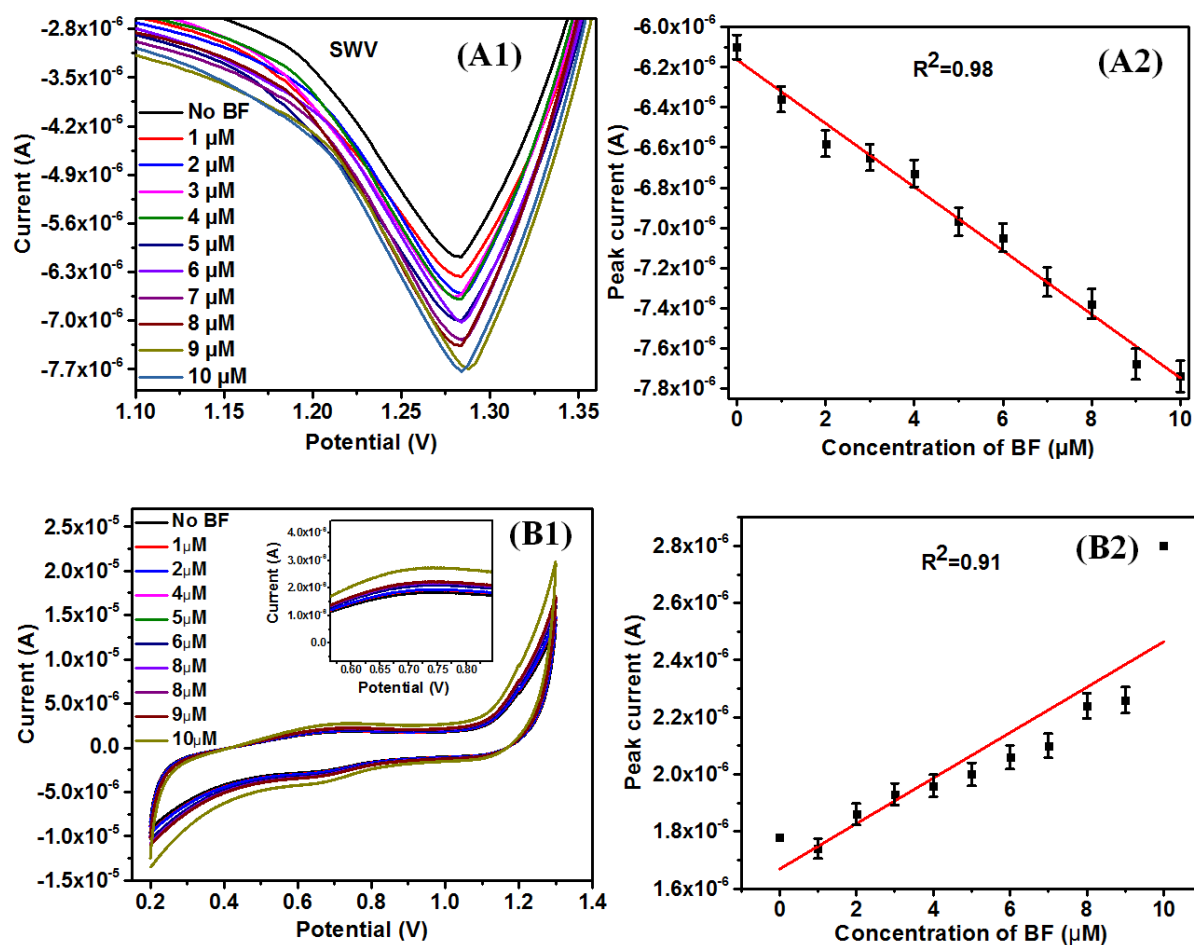

**Fig. S10.** (A1) SWV graph of composite modified Pt electrode with different concentration of bifenthrin, (A2) Calibration curve with analyte (bifenthrin pesticide) concentrations vs peak current (B1) CV graph of composite modified Pt electrode with different concentration of bifenthrin, (B2) Calibration curve with analyte (bifenthrin pesticide) concentrations vs peak current

**Table S1:** Table for FTIR peak assignment of the components and composite LB film.

| S. No | Peak | Functional group identification | References |
|-------|------|---------------------------------|------------|
| 1     | 843  | P-F stretching of RuPo          | [41]       |
| 2     | 1426 | P-F stretching of RuPo          | [41]       |
| 3     | 1523 | N-H stretching of chitosan      | [54]       |

|    |      |                                    |      |
|----|------|------------------------------------|------|
| 4  | 3360 | O-H stretching of chitosan         | [89] |
| 5  | 3370 | N-H stretching of pure ODA         | [90] |
| 6  | 3373 | N-H stretching of ODA in composite | [90] |
| 7  | 3380 | N-H stretching of ODA              | [88] |
| 8  | 3386 | N-H stretching of RuPo             | [91] |
| 9  | 3443 | N-H stretching of RuPo             | [42] |
| 10 | 3742 | -OH group of chitosan              | [91] |

\*\*\*\*\*
